# Supplementary material
Source: publisher figshare collection journal article supplement (https://acs.figshare.com/ndownloader/files/5325031)
Supplement: Supplementary file 1 [file 5325031]

Supplementary materials:

## Sodium Ion Transport Mechanism in Antiperovskite Electrolytes of Na<sub>3</sub>OBr and Na<sub>4</sub>OI<sub>2</sub>: An *in-situ* Neutron Diffraction Study

Jinlong Zhu<sup>1†</sup>, Yonggang Wang<sup>1,2,3†</sup>, Shuai Li<sup>1</sup>, John W. Howard<sup>1</sup>, Jörg Neuefeind<sup>4</sup>, Yang Ren<sup>5</sup>, Hui Wang<sup>6</sup>, Chengdu Liang<sup>6</sup>, Wenge Yang<sup>2,7</sup>, Ruqiang Zou<sup>8\*</sup>, Changqing Jin<sup>9</sup>, Yusheng Zhao,<sup>1\*</sup>

<sup>1</sup>High Pressure Science and Engineering Center, University of Nevada, Las Vegas, Nevada 89154, United States

<sup>2</sup>High Pressure Synergetic Consortium, Geophysical Laboratory, Carnegie Institution of Washington, Argonne, IL 60439, USA

<sup>3</sup>Institute of Nanostructured Functional Materials, Huanghe Science and Technology College, Zhengzhou, Henan 450006, China

<sup>4</sup>Neutron Scattering Science Directorate, Oak Ridge National Laboratory, 1 Bethel Valley Road, Oak Ridge, TN 37831-6475, USA

<sup>5</sup>Advanced Photon Source, Argonne National Laboratory, 9700 S. Cass Ave., Argonne, Illinois 60439, USA

<sup>6</sup>Center for Nanophase Materials Sciences, Materials Science and Technology Division, and Chemical Sciences Division, Oak Ridge National Laboratory, Oak Ridge Tennessee, 37831, USA

<sup>7</sup>Center for High Pressure Science and Technology Advanced Research (HPSTAR), Pudong, Shanghai, 201203, China

<sup>8</sup>Beijing Key Lab of Theory and Technology for Advanced Battery Materials, College of Engineering, Peking University, Beijing 100871, China

<sup>9</sup>National Lab for Condensed Matter Physics, Institute of Physics, Chinese Academy of Sciences, Beijing 100190, China

<sup>†</sup>Authors contribute equally to this work.

\*To whom correspondence should be addressed. E-mail: [rzou@pku.edu.cn](mailto:rzou@pku.edu.cn) (R. Zou)  
[yusheng.zhao@unlv.edu](mailto:yusheng.zhao@unlv.edu) (Y. Zhao)

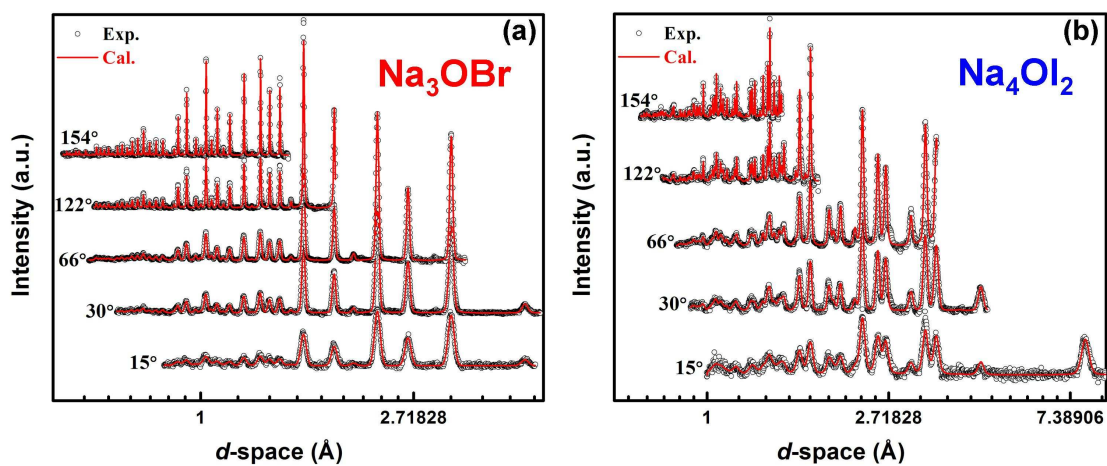

**Figure S1** Neutron diffraction patterns of (a)  $\text{Na}_3\text{OBr}$  and (b)  $\text{Na}_4\text{OI}_2$  at 500 K, for all the five detector banks at  $2\theta = 154^\circ$ ,  $122^\circ$ ,  $66^\circ$ ,  $30^\circ$ , and  $15^\circ$  used for Rietveld refinement and MEM analysis.
